# Supplementary material for: Exploring non-linear relationships between neighbourhood walkability and health: a cross-sectional study among US primary care patients with chronic conditions
Source: HighWire-hosted journal article supplement (doi:10.1136/bmjopen-2022-061086), 2022-08-01

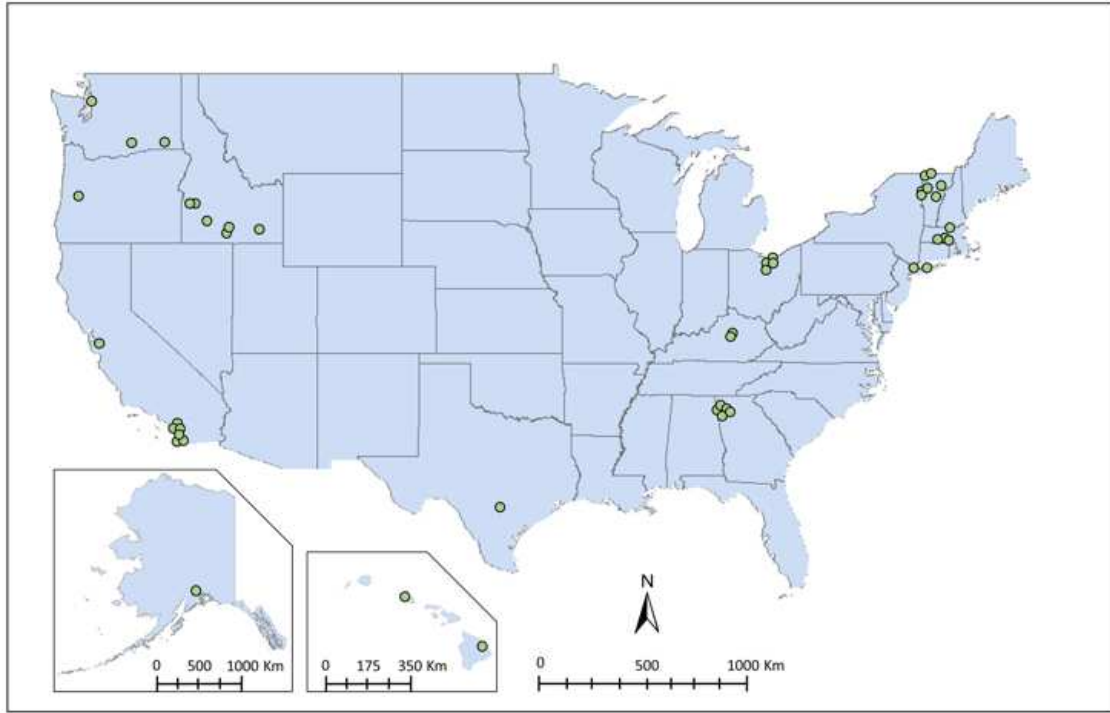

Supplement: bmjopen-2022-061086supp001_data_supplement.pdf [file bmjopen-2022-061086supp001_data_supplement.pdf]
